# Supplementary material
Source: PubMed Central journal article supplement (PMC8815740)
Supplement: KID.0001132020SupplementaryData1.pdf [file KID.0001132020SupplementaryData1.pdf]

## REDUCTION Investigator team- Site staff list for publications

| Site                    | First name    | Last name     |
|-------------------------|---------------|---------------|
| Alice Springs Hospital  | Senthil Kumar | Balakrishnan  |
| Alice Springs Hospital  | David         | Fernandes     |
| Armadale Hospital       | Hemant        | Kulkarni      |
| Armadale Hospital       | Casey         | Light         |
| Armadale Hospital       | Jo            | Ryan          |
| Auckland Hospital       | Emma          | Marsh         |
| Auckland Hospital       | Jason         | Wei           |
| Auckland Hospital       | David         | Semple        |
| Austin Hospital         | Vilma         | Lleva         |
| Austin Hospital         | Lucy          | Mwangi        |
| Austin Hospital         | Peter         | Mount         |
| Austin Hospital         | Maree         | Ross-Smith    |
| Austin Hospital         | Marieke       | Veenendaal    |
| Barwon Health           | Vicki         | Smith         |
| Barwon Health           | Christine     | Somerville    |
| Cairns Hospital         | Shaun         | Davidson-West |
| Cairns Hospital         | Natalie       | Grainer       |
| Cairns Hospital         | Stella        | Green         |
| Cairns Hospital         | Murty         | Mantha        |
| Cairns Hospital         | Kati          | Thiessen      |
| Canberra Hospital       | Girish        | Talaulikar    |
| Canberra Hospital       | Alison        | Winsbury      |
| Canberra Hospital       | Irene         | Yao           |
| Canberra Hospital       | Emily         | Neville       |
| Concord Hospital        | Khalilah      | Marquez       |
| Concord Hospital        | Mona          | Razavian      |
| Concord Hospital        | Lisa          | Tienstra      |
| Concord Hospital        | Glenn         | Stewart       |
| Eastern Health          | Cathy         | Chan          |
| Eastern Health          | Peta          | McLean        |
| Eastern Health          | Lawrence      | McMahon       |
| Eastern Health          | Matthew       | Roberts       |
| Fiona Stanley Hospital  | Monika        | Chang         |
| Fiona Stanley Hospital  | Anna          | Chiam         |
| Fiona Stanley Hospital  | Duncan        | Wright        |
| Fiona Stanley Hospital  | Samadhi       | Wimalasena    |
| Fiona Stanley Hospital  | Orla          | O'Brien       |
| Fiona Stanley Hospital  | Ramyasuda     | Swaminathan   |
| Fiona Stanley Hospital  | Chan          | Wing          |
| Fiona Stanley Hospital  | Lorraine      | Ansell        |
| Fiona Stanley Hospital  | Samadhi       | Wimalasena    |
| Fiona Stanley Hospital  | Harish        | Puttagunta    |
| Flinders Medical Centre | Jeffrey       | Barbara       |
| Flinders Medical Centre | Amanda        | Luke          |

| Site                                       | First name    | Last name      |
|--------------------------------------------|---------------|----------------|
| Flinders Medical Centre                    | Margaret      | Pummeroy       |
| Flinders Medical Centre                    | Kim           | Torpey         |
| Gold Coast Hospital and Health Service     | Gemma         | Nicholls       |
| Gold Coast Hospital and Health Service     | Amy           | Swinbank       |
| Gold Coast Hospital and Health Service     | Thomas        | Titus          |
| John Hunter Hospital                       | Peter         | Choi           |
| John Hunter Hospital                       | Ginger        | Chu            |
| John Hunter Hospital                       | Leanne        | Garvey         |
| John Hunter Hospital                       | Alastair      | Gillies        |
| Liverpool Hospital                         | Josephine     | Chow           |
| Liverpool Hospital                         | Imelda        | De Guzman      |
| Liverpool Hospital                         | Jeanny        | Gando          |
| Liverpool Hospital                         | Jeffrey       | Wong           |
| Liverpool Hospital                         | Richard       | Nguyen         |
| Mackay Hospital                            | Roy           | Cherian        |
| Mackay Hospital                            | Raye          | Gillard        |
| Mackay Hospital                            | Rachel        | James          |
| Mater Hospital                             | Michael       | Burke          |
| Mater Hospital                             | Leanne        | Glancy         |
| Mater Hospital                             | Shimbie       | Lewis          |
| Mater Hospital                             | Dr Richard    | Baer           |
| Mater Hospital                             | Sophie        | Wade           |
| Middlemore Hospital                        | Daniel        | Lin            |
| Middlemore Hospital                        | Fortune       | Ngwenya        |
| Middlemore Hospital                        | Anupkumar     | Narayanankutty |
| Monash Health                              | Kate          | Fitt           |
| Monash Health                              | Peter         | Kerr           |
| Monash Health                              | Prof Kevan    | Polkinghorne   |
| Monash Health                              | Mechelle      | Seneviratne    |
| Sunshine Coast Hospital and Health Service | Nicholas      | Gray           |
| Sunshine Coast Hospital and Health Service | Gerald        | Hilder         |
| Sunshine Coast Hospital and Health Service | Kaylene       | Wadd           |
| Sunshine Coast Hospital and Health Service | Andrea        | Pollock        |
| Sunshine Coast Hospital and Health Service | Stanley       | Searle         |
| Nepean Hospital                            | Muralikrishna | Komala         |
| Nepean Hospital                            | Junie         | McCourt        |
| Nepean Hospital                            | Craig         | Lawlor         |
| Ipswich Hospital                           | Julia         | Bell           |
| Ipswich Hospital                           | David W       | Johnson        |
| Prince of Wales Hospital                   | Michaela      | Kelleher       |
| Prince of Wales Hospital                   | Debbie        | Knagge         |
| Prince of Wales Hospital                   | Sradha        | Kotwal         |
| Metro South Hospital and Health Service    | Amanda        | Coburn         |
| Metro South Hospital and Health Service    | Sarah         | Guo            |
| Metro South Hospital and Health Service    | David W       | Johnson        |

| Site                                    | First name    | Last name      |
|-----------------------------------------|---------------|----------------|
| Metro South Hospital and Health Service | Joanna        | Sudak          |
| Metro South Hospital and Health Service | Diana         | Leary          |
| Rockhampton Hospital                    | Jenny         | Anderson       |
| Rockhampton Hospital                    | Thin          | Han            |
| Rockhampton Hospital                    | Tresna        | Titmarsh       |
| Rockhampton Hospital                    | Leticia       | Spann          |
| Royal Adelaide Hospital                 | Emily         | Adam           |
| Royal Adelaide Hospital                 | Bronwyn       | Hockley        |
| Royal Adelaide Hospital                 | Jenny         | Latte          |
| Royal Adelaide Hospital                 | Yvonne        | Matthew        |
| Royal Adelaide Hospital                 | Stephen       | McDonald       |
| Royal Adelaide Hospital                 | Chen Au       | Peh            |
| Royal Adelaide Hospital                 | Rebecca       | Taylor         |
| Royal Brisbane Hospital                 | David         | McIntyre       |
| Royal Brisbane Hospital                 | Sharadchandra | Ratanjee       |
| Royal Darwin Hospital                   | Karolynn      | Maurice        |
| Royal Darwin Hospital                   | Fiona         | Rettie         |
| Royal Darwin Hospital                   | Madhivanan    | Sundaram       |
| Royal Darwin Hospital                   | Naomi         | Grimshaw       |
| Royal Hobart Hospital                   | Matthew       | Jose           |
| Royal Hobart Hospital                   | Gail          | Read           |
| Royal Melbourne Hospital                | Jayne         | Amy            |
| Royal Melbourne Hospital                | Patricia      | Coutts         |
| Royal Melbourne Hospital                | Maria         | Presno         |
| Royal Melbourne Hospital                | Nigel         | Toussaint      |
| Royal North Shore Hospital              | Debbie        | Knagge         |
| Royal North Shore Hospital              | Colleen       | Van Senden     |
| Royal North Shore Hospital              | Linh          | Pham           |
| Royal North Shore Hospital              | Muh Geot      | Wong           |
| Royal Prince Alfred Hospital            | Jane          | Nicholson      |
| Royal Prince Alfred Hospital            | Paul          | Snelling       |
| Sir Charles Gairdner Hospital           | Neil          | Boudville      |
| Sir Charles Gairdner Hospital           | Alison        | Farmer         |
| Sir Charles Gairdner Hospital           | Ingrid        | Holmes         |
| Sir Charles Gairdner Hospital           | Victoria      | Link           |
| Sir Charles Gairdner Hospital           | Vivien        | Perreau        |
| Sir Charles Gairdner Hospital           | Nicole        | Warnecke       |
| St George Hospital                      | Sunil         | Badve          |
| St George Hospital                      | Yanella       | Martinez-Smith |
| St George Hospital                      | Jayson        | Catiwa         |
| St Vincent's Hospital                   | Frank         | Ierino         |
| St Vincent's Hospital                   | Emmet         | O'flaherty     |
| Tamworth Hospital                       | Stephen       | May            |
| Tamworth Hospital                       | Cheryl        | Wertheim       |
| Tamworth Hospital                       | Jill          | Telfer         |

| Site                                   | First name      | Last name          |
|----------------------------------------|-----------------|--------------------|
| The Alfred Hospital                    | Omar            | Tombocon           |
| The Alfred Hospital                    | Rowan           | Walker             |
| The Alfred Hospital                    | Anne            | Weston             |
| The Alfred Hospital                    | Scott           | Wilson             |
| The George Institute for Global Health | Benjamin        | Talbot             |
| Toowoomba Hospital                     | Elizabeth       | Coroneos           |
| Toowoomba Hospital                     | Shannon         | Nugent             |
| Toowoomba Hospital                     | Ian             | Fox                |
| Toowoomba Hospital                     | Sree            | Venuthurupalli     |
| Waikato Hospital                       | Helen           | O'Connell          |
| Waikato Hospital                       | Deborah         | Peek               |
| Waikato Hospital                       | Kannaiyan       | Rabindranath       |
| Waikato Hospital                       | Christine       | Torrie             |
| Waikato Hospital                       | Tania           | Smith              |
| Waikato Hospital                       | Andrew          | Henderson          |
| Waitemata DHB                          | Naveed          | Ahmed              |
| Waitemata DHB                          | Vinish          | Thekkoot Vasudevan |
| Wellington Hospital                    | Grant           | Pidgeon            |
| Western Health                         | Jennifer        | Connor             |
| Western Health                         | Ruth            | Thachaw            |
| Western Health                         | Sandra          | Crikis             |
| Whangarei Hospital                     | Lynda           | Cumming            |
| Whangarei Hospital                     | Walaa           | Saweirs            |
| Whangarei Hospital                     | William (Billy) | Stewart            |
| Whangarei Hospital                     | Sharen          | Supershad          |
| Wollongong Hospital                    | Pauline         | Byrne              |
| Wollongong Hospital                    | Karumathil      | Murali             |
| Wollongong Hospital                    | Hicham          | Cheikh Hassan      |
| Wollongong Hospital                    | Elizabeth       | Fleming            |
| WSLHD - Auburn Hospital                | Lin             | Huang              |
| WSLHD - Blacktown Hospital             | Romiereeza      | Dizon              |
| WSLHD - Blacktown Hospital             | Deepika         | Joshi              |
| WSLHD - Blacktown Hospital             | Jon             | Mendoza            |
| WSLHD - Westmead Hospital              | Bishi           | Augustine          |
| WSLHD - Westmead Hospital              | Disha           | Balraj             |
| WSLHD - Westmead Hospital              | Vincent         | Lee                |
| WSLHD - Westmead Hospital              | David           | O'Donnell          |
| WSLHD - Westmead Hospital              | Khin            | Myint              |

### Other contributing partner organisations

| Organisation name                                                      |
|------------------------------------------------------------------------|
| ANZDATA Registry                                                       |
| Department of Health and Human Services Victoria – Safer Care Victoria |
| Kidney Health Australia                                                |
