# Supplementary material
Source: PubMed Central journal article supplement (PMC8815740)
Supplement: KID.0001132020SupplementaryData2.pdf [file KID.0001132020SupplementaryData2.pdf]

## Supplemental Materials

Table 1 – Ethics committee and services covered

Table 2 – Allocation schedule

Table 3 - Data collected in the trial/CRF

Table 4 – New questions added in the intervention phase

Table 1 – Ethics committee and services covered

| Ethics committee                                                               | Approval number | Services covered                                                                                                                                                                                                                                                                                                                                                                                                                                                                                                                                                                                                                                                                                                                                                                                                                   |
|--------------------------------------------------------------------------------|-----------------|------------------------------------------------------------------------------------------------------------------------------------------------------------------------------------------------------------------------------------------------------------------------------------------------------------------------------------------------------------------------------------------------------------------------------------------------------------------------------------------------------------------------------------------------------------------------------------------------------------------------------------------------------------------------------------------------------------------------------------------------------------------------------------------------------------------------------------|
| Sydney Local Health District<br>CRGH Human Research Ethics<br>Committee (HREC) | HREC/16/CRGH/76 | Austin Health; Cairns Hospital;<br>Concord Hospital; Eastern<br>Health; Flinders Medical<br>Centre; Geelong Hospital<br>(Barwon Health); Gold Coast<br>Hospital and Health Service;<br>John Hunter Hospital;<br>Liverpool Hospital; Mackay<br>Hospital; Monash Health;<br>Sunshine Coast University<br>Hospital and Health Service;<br>Nepean Hospital; Prince of<br>Wales Hospital; Metro South<br>Hospital and Health Service<br>(including Princess Alexandria<br>Hospital, Redlands and Logan<br>Hospital); Rockhampton; Royal<br>Adelaide Hospital; Royal<br>Brisbane Hospital; Royal<br>Melbourne Hospital; Royal<br>North Shore Hospital; Royal<br>Prince Alfred Hospital; St<br>George Hospital; St Vincent’s<br>Hospital, Melbourne;<br>Tamworth Hospital; The Alfred<br>Hospital; Toowoomba<br>Hospital; Western Health; |

|                                                                                                     |                |                                                                                                                 |
|-----------------------------------------------------------------------------------------------------|----------------|-----------------------------------------------------------------------------------------------------------------|
|                                                                                                     |                | Western Sydney Local Health District (including Westmead, Auburn and Blacktown Hospitals); Wollongong Hospital. |
| Central Australia HREC                                                                              | HREC-16-420    | Alice Springs Hospital                                                                                          |
| HREC of the Northern Territory<br>Department of Health and<br>Menziess School of Health<br>Research | HREC/2016-2660 | Royal Darwin Hospital                                                                                           |
| Royal Perth Hospital HREC                                                                           | HREC 2016-154  | Armadale Health Service, Fiona Stanley Hospital, Sir Charles Gairdner Hospital                                  |
| The University of Tasmania<br>HREC                                                                  | H0015890       | Royal Hobart Hospital                                                                                           |
| Mater Misericordiae Ltd HREC                                                                        | HREC/17/MHS/99 | Mater Hospital, Brisbane                                                                                        |
| Australian Capital Territory<br>Health HREC                                                         | HREC/17/MHS/99 | The Canberra Hospital and Health Service                                                                        |

Table 2 – Allocation schedule

| <b>Allocation schedule</b>    | <b>Number of services</b> | <b>Mean number of catheters</b> |
|-------------------------------|---------------------------|---------------------------------|
| Treatment/Treatment/Treatment | 12                        | 78.7                            |
| Control/Treatment/Treatment   | 12                        | 79.7                            |
| Control/Control/Treatment     | 13                        | 86.7                            |

# REDUCCTION CASE REPORT FORM

Site Number: |\_|\_|\_|\_|

Subject Number: |\_|\_|\_|\_|\_|\_|\_|\_|

| Demographic data* |                                                                                                         |                                                                                                                                                                                                                                                                                                                                                                                                                                                   |
|-------------------|---------------------------------------------------------------------------------------------------------|---------------------------------------------------------------------------------------------------------------------------------------------------------------------------------------------------------------------------------------------------------------------------------------------------------------------------------------------------------------------------------------------------------------------------------------------------|
| 1.                | Has the patient been given the REDUCCTION participant information sheet and not opted out of the study? | <input type="checkbox"/> Yes<br><input type="checkbox"/> No (No data entry allowed unless yes elected in Q1)<br><input type="checkbox"/> N/A (For waiver of consent sites only)                                                                                                                                                                                                                                                                   |
| 2.                | Patient details                                                                                         | First name: .....<br>Middle: .....<br>Last name: .....<br>MRN: .....                                                                                                                                                                                                                                                                                                                                                                              |
| 3.                | Date of birth<br>DD/MM/YYYY                                                                             | _ _  /  _ _  /  _ _ _ _ _ <br><br>Country of birth:<br><input type="checkbox"/> Australia<br><input type="checkbox"/> New Zealand<br><input type="checkbox"/> Other- please specify: .....<br><br>If in Australia- State of residence:<br><input type="checkbox"/> NSW <input type="checkbox"/> ACT <input type="checkbox"/> VIC <input type="checkbox"/> QLD <input type="checkbox"/> SA <input type="checkbox"/> WA <input type="checkbox"/> NT |
| 4.                | Gender                                                                                                  | <input type="checkbox"/> Male<br><input type="checkbox"/> Female<br><input type="checkbox"/> Other                                                                                                                                                                                                                                                                                                                                                |

# REDUCCTION CASE REPORT FORM

Site Number: |\_|\_|\_|\_|

Subject Number: |\_|\_|\_|\_|\_|\_|\_|\_|

|    |              |                                                                                                                                                                                                                                                                                                                                                                                                                                                                                               |
|----|--------------|-----------------------------------------------------------------------------------------------------------------------------------------------------------------------------------------------------------------------------------------------------------------------------------------------------------------------------------------------------------------------------------------------------------------------------------------------------------------------------------------------|
| 5. | Patient race | <input type="checkbox"/> Asian- (including Chinese, Indian, Malay, Filipino, Vietnamese, Indonesian)<br><input type="checkbox"/> Caucasian<br><input type="checkbox"/> Indigenous Australian (including Aboriginal & Torres Strait Islander)<br><input type="checkbox"/> Maori<br><input type="checkbox"/> Pacific islander (including Tongan, Samoan and Cook Islander)<br><input type="checkbox"/> Other (specify)<br><input type="checkbox"/> Medical records do not indicate patient race |
|----|--------------|-----------------------------------------------------------------------------------------------------------------------------------------------------------------------------------------------------------------------------------------------------------------------------------------------------------------------------------------------------------------------------------------------------------------------------------------------------------------------------------------------|

# REDUCCTION CASE REPORT FORM

Site Number: |\_|\_|\_|\_|

Subject Number: |\_|\_|\_|\_|\_|\_|\_|\_|

| Medical History* |                                                                                                                                                                                                                               |                                                                                                                                     |
|------------------|-------------------------------------------------------------------------------------------------------------------------------------------------------------------------------------------------------------------------------|-------------------------------------------------------------------------------------------------------------------------------------|
| 1.               | Does the patient have Diabetes ( <i>defined as requiring dietary treatment, oral hypoglycaemic medication and/or insulin</i> )?                                                                                               | <input type="checkbox"/> Yes (Diet controlled)<br><input type="checkbox"/> Yes Medication controlled<br><input type="checkbox"/> No |
| 2.               | Is the patient on any immunosuppressant medication? *<br><br><i>(I.e: oral prednisone, cyclosporine, tacrolimus, azathioprine, hydroxychloroquine</i><br><br><i>We will provide detailed list in the data dictionary etc)</i> | <input type="checkbox"/> Yes <span style="margin-left: 150px;"><input type="checkbox"/> No</span>                                   |

# REDUCCTION CASE REPORT FORM

Site Number: |\_|\_|\_|\_|

Subject Number: |\_|\_|\_|\_|\_|\_|\_|\_|

## Pre-Intervention form

| Catheter Insertion |                                                                                                                                             |                                                                                                                                                                                                                        |                                                                |
|--------------------|---------------------------------------------------------------------------------------------------------------------------------------------|------------------------------------------------------------------------------------------------------------------------------------------------------------------------------------------------------------------------|----------------------------------------------------------------|
| 1.                 | Is this a new catheter insertion?*                                                                                                          | <input type="checkbox"/> Yes- new catheter<br><input type="checkbox"/> No- re-wire                                                                                                                                     |                                                                |
| 2.                 | Date catheter Inserted*<br>(DD/MM/YYYY)                                                                                                     | _ _  /  _ _  /  _ _ _ _ <br><br>ALERT: <i>If the date of line insertion is within 48 hours of previous catheter removal proceed to Q3. If not within 48 hours, go to Q4.</i><br><br><input type="checkbox"/> Not known |                                                                |
| 3.                 | Date renal unit assumed care of patient*<br>(DD/MM/YYYY)                                                                                    | _ _  /  _ _  /  _ _ _ _ <br><br>To default to date in Q3                                                                                                                                                               |                                                                |
| 4.                 | Is this catheter a replacement for the previous catheter that was removed on DD/MM/YYYY ( <i>pre-populated with catheter removal date</i> ) | <input type="checkbox"/> Yes<br><input type="checkbox"/> No                                                                                                                                                            |                                                                |
| 5.                 | Catheter insertion site*                                                                                                                    | <input type="checkbox"/> Left side of body<br><input type="checkbox"/> Right side of body                                                                                                                              |                                                                |
| 6.                 | Vein of insertion*                                                                                                                          | <input type="checkbox"/> Subclavian<br><input type="checkbox"/> Internal Jugular<br><input type="checkbox"/> Femoral<br><input type="checkbox"/> Other: specify .....                                                  |                                                                |
| 7.                 | Catheter Type*                                                                                                                              | <input type="checkbox"/> Tunnelled (proceed to Q7)<br><input type="checkbox"/> Non-tunnelled (proceed to Q10)                                                                                                          |                                                                |
| 8.                 | Catheter Brand                                                                                                                              | <input type="checkbox"/> Baxter                                                                                                                                                                                        | <i>Types of tunnelled catheter produced by this brand- TBC</i> |
|                    |                                                                                                                                             | <input type="checkbox"/> Gambro                                                                                                                                                                                        |                                                                |

# REDUCCTION CASE REPORT FORM

Site Number: |\_|\_|\_|\_|

Subject Number: |\_|\_|\_|\_|\_|\_|\_|\_|

|     |                                                                                           |                                                                                                                                                                                                                                                            |                                                                                                         |
|-----|-------------------------------------------------------------------------------------------|------------------------------------------------------------------------------------------------------------------------------------------------------------------------------------------------------------------------------------------------------------|---------------------------------------------------------------------------------------------------------|
|     |                                                                                           | <input type="checkbox"/> Medcomp                                                                                                                                                                                                                           |                                                                                                         |
|     |                                                                                           | <input type="checkbox"/> Arrow                                                                                                                                                                                                                             |                                                                                                         |
|     |                                                                                           | <input type="checkbox"/> Bard                                                                                                                                                                                                                              |                                                                                                         |
|     |                                                                                           | <input type="checkbox"/> Palindrome                                                                                                                                                                                                                        |                                                                                                         |
|     |                                                                                           | <input type="checkbox"/> Tesio                                                                                                                                                                                                                             |                                                                                                         |
|     |                                                                                           | <input type="checkbox"/> Other: specify .....                                                                                                                                                                                                              |                                                                                                         |
|     |                                                                                           | <input type="checkbox"/> Not known                                                                                                                                                                                                                         |                                                                                                         |
| 9.  | Blood flow rate (ml/min)<br><br><i>Maximum blood flow rate achieved on first dialysis</i> | <input type="checkbox"/> <200<br><input type="checkbox"/> 200-240<br><input type="checkbox"/> 250-299<br><input type="checkbox"/> 301-349                                                                                                                  | <input type="checkbox"/> 350-399<br><input type="checkbox"/> 400+<br><input type="checkbox"/> Not known |
| 10. | Hospital location of catheter insertion*                                                  | <input type="checkbox"/> Operating theatre<br><input type="checkbox"/> Radiology<br><input type="checkbox"/> ICU<br><input type="checkbox"/> Renal Ward/ Dialysis unit<br><input type="checkbox"/> Emergency Department<br><input type="checkbox"/> Other  |                                                                                                         |
| 11. | Who inserted the catheter?*                                                               | <input type="checkbox"/> Renal Unit staff<br><input type="checkbox"/> Interventional Radiology<br><input type="checkbox"/> ICU staff<br><input type="checkbox"/> Anaesthetics<br><input type="checkbox"/> Surgical staff<br><input type="checkbox"/> Other |                                                                                                         |

# REDUCCTION CASE REPORT FORM

Site Number: I\_\_I\_\_I\_\_I

Subject Number: I\_\_I\_\_I\_\_I\_\_I\_\_I

|     |                                                                                                        |                                                                                                                                                                                                                                                                                                                                                                                                                                                                                                                                                                                                                                                                                         |                                                                                                                                                                                                                                                                                                                                                                                                                                                                                                              |
|-----|--------------------------------------------------------------------------------------------------------|-----------------------------------------------------------------------------------------------------------------------------------------------------------------------------------------------------------------------------------------------------------------------------------------------------------------------------------------------------------------------------------------------------------------------------------------------------------------------------------------------------------------------------------------------------------------------------------------------------------------------------------------------------------------------------------------|--------------------------------------------------------------------------------------------------------------------------------------------------------------------------------------------------------------------------------------------------------------------------------------------------------------------------------------------------------------------------------------------------------------------------------------------------------------------------------------------------------------|
| 12. | Reason for dialysis requiring central venous access*                                                   | <input type="checkbox"/> Acute Kidney Injury (proceed to Q16 /form complete)<br><input type="checkbox"/> Commencement of maintenance dialysis without functioning access (proceed to Q13)<br><input type="checkbox"/> Transfer from Peritoneal Dialysis (temporary or permanent) (proceed to Q15 /form complete)<br><input type="checkbox"/> Fistula thrombosis (proceed to Q16 /form complete)<br><input type="checkbox"/> Fistula infection (proceed to Q16 /form complete)<br><input type="checkbox"/> Graft thrombosis (proceed to Q16 /form complete)<br><input type="checkbox"/> Graft infection (proceed to Q16 /form complete)<br><input type="checkbox"/> Other: specify ..... |                                                                                                                                                                                                                                                                                                                                                                                                                                                                                                              |
| 13. | For commencement of dialysis without functioning access patients only (2 <sup>nd</sup> option in Q12)* | What is the patients relationship to a Renal Service (includes other Renal services outside of study site)                                                                                                                                                                                                                                                                                                                                                                                                                                                                                                                                                                              | <input type="checkbox"/> New to any service (initial presentation within last 3 months)<br><input type="checkbox"/> New to any service (initial presentation within last 3-6 months)<br><input type="checkbox"/> Known to a renal service (patient seen within last 6 months)<br><input type="checkbox"/> Known to a renal service, lost to follow up (not seen within last 6 months)<br><input type="checkbox"/> Known to a renal service but has repeatedly refused access creation (within last 6 months) |
| 14. | For commencement of dialysis without functioning access patients only (2 <sup>nd</sup> option in Q12)* | Has the patient undergone attempts at access creation (including for peritoneal dialysis) prior to catheter insertion?                                                                                                                                                                                                                                                                                                                                                                                                                                                                                                                                                                  | <input type="checkbox"/> Yes (proceed to Q15)<br><input type="checkbox"/> No (form complete)<br><br>Proceed to Q16/form complete                                                                                                                                                                                                                                                                                                                                                                             |
| 15. | (To be answered only if Q14=yes)                                                                       | How many attempts?                                                                                                                                                                                                                                                                                                                                                                                                                                                                                                                                                                                                                                                                      | <input type="checkbox"/> once<br><input type="checkbox"/> twice or more                                                                                                                                                                                                                                                                                                                                                                                                                                      |



# REDUCCTION CASE REPORT FORM

Site Number: |\_|\_|\_|\_|

Subject Number: |\_|\_|\_|\_|\_|\_|\_|\_|

| Ongoing Interventions (within catheter period)* |                                                                                                                            |                                                                                                                                                                                                                                                                                                                                                                                                                                                                                                                                |
|-------------------------------------------------|----------------------------------------------------------------------------------------------------------------------------|--------------------------------------------------------------------------------------------------------------------------------------------------------------------------------------------------------------------------------------------------------------------------------------------------------------------------------------------------------------------------------------------------------------------------------------------------------------------------------------------------------------------------------|
| 1.                                              | Has the patient undergone any dialysis access related procedures (surgical or otherwise) within the life of this catheter? | <input type="checkbox"/> Yes<br><input type="checkbox"/> No (proceed to Q4/ form complete)                                                                                                                                                                                                                                                                                                                                                                                                                                     |
| 2.                                              | Date of procedure<br>DD/MM/YYYY                                                                                            | _ _ _  /  _ _ _  /  _ _ _ _ _                                                                                                                                                                                                                                                                                                                                                                                                                                                                                                  |
| 3                                               | Procedure type                                                                                                             | <input type="checkbox"/> Re-suturing of catheter<br><input type="checkbox"/> Thrombolysis to restore catheter patency (not as regular lock)<br><input type="checkbox"/> Creation of new AV fistula<br><input type="checkbox"/> Creation of new AV Graft<br><input type="checkbox"/> Insertion of new PD catheter<br><input type="checkbox"/> Revision of existing AV fistula or AV Graft<br><input type="checkbox"/> Thrombectomy +/- Angioplasty to a AV Fistula or AV Graft<br><input type="checkbox"/> Other: specify ..... |

| Infectious Events* |                                                                                          |                                                                                    |
|--------------------|------------------------------------------------------------------------------------------|------------------------------------------------------------------------------------|
| 1.                 | Have there been any catheter related infectious events during the life of this catheter? | <input type="checkbox"/> Yes<br><input type="checkbox"/> No (If no proceed to Q10) |
| 2.                 | Date of catheter related infection onset                                                 | _ _ _  /  _ _ _  /  _ _ _ _ _                                                      |

# REDUCCTION CASE REPORT FORM

Site Number: |\_|\_|\_|\_|

Subject Number: |\_|\_|\_|\_|\_|\_|\_|\_|

|                                                                                                                                                                                                                                                |                                                                                                                                                                                                                                                                                                                        |                                                                                                                                                                                                                                                                                                                                                                                                                                                                                                                                                                                                                                                                                                                                                                                                                                                                                                                                                                                                                                                                                                                         |                                                                                                                                                                                                                                                |                                        |                                 |                                                                                                                   |                                      |                                                                                                                                                                                                                                                                                                                        |
|------------------------------------------------------------------------------------------------------------------------------------------------------------------------------------------------------------------------------------------------|------------------------------------------------------------------------------------------------------------------------------------------------------------------------------------------------------------------------------------------------------------------------------------------------------------------------|-------------------------------------------------------------------------------------------------------------------------------------------------------------------------------------------------------------------------------------------------------------------------------------------------------------------------------------------------------------------------------------------------------------------------------------------------------------------------------------------------------------------------------------------------------------------------------------------------------------------------------------------------------------------------------------------------------------------------------------------------------------------------------------------------------------------------------------------------------------------------------------------------------------------------------------------------------------------------------------------------------------------------------------------------------------------------------------------------------------------------|------------------------------------------------------------------------------------------------------------------------------------------------------------------------------------------------------------------------------------------------|----------------------------------------|---------------------------------|-------------------------------------------------------------------------------------------------------------------|--------------------------------------|------------------------------------------------------------------------------------------------------------------------------------------------------------------------------------------------------------------------------------------------------------------------------------------------------------------------|
| <p>3.</p>                                                                                                                                                                                                                                      | <p><i>Type of catheter related infection?</i></p> <p><i>If suspected please provide infectious event details to TGI</i></p> <p><i>More than one option can be elected</i></p>                                                                                                                                          | <p><input type="checkbox"/> Proven catheter related bacteraemia</p> <p><input type="checkbox"/> Suspected catheter related bacteraemia (pending TGI adjudication)</p> <p><input type="checkbox"/> Suspected catheter related bacteraemia (TGI adjudication confirmed)</p> <p><input type="checkbox"/> Tunnel related</p> <p><input type="checkbox"/> Exit site infection</p> <p><input type="checkbox"/> Other: specify.....</p>                                                                                                                                                                                                                                                                                                                                                                                                                                                                                                                                                                                                                                                                                        |                                                                                                                                                                                                                                                |                                        |                                 |                                                                                                                   |                                      |                                                                                                                                                                                                                                                                                                                        |
| <p>4.</p>                                                                                                                                                                                                                                      | <p>Were blood cultures taken within 7 days of the infectious event?</p>                                                                                                                                                                                                                                                | <p><input type="checkbox"/> Yes (proceed to Q5)</p> <p><input type="checkbox"/> No (If no proceed to Question 9)</p>                                                                                                                                                                                                                                                                                                                                                                                                                                                                                                                                                                                                                                                                                                                                                                                                                                                                                                                                                                                                    |                                                                                                                                                                                                                                                |                                        |                                 |                                                                                                                   |                                      |                                                                                                                                                                                                                                                                                                                        |
| <p>5.</p>                                                                                                                                                                                                                                      |                                                                                                                                                                                                                                                                                                                        | <table border="1"> <tr> <td data-bbox="571 981 933 1361"> <p>5a. Date blood cultures taken within 7 days of the onset of infectious event</p> <p><i>(if more than one culture was taken, then record either the positive result or the one closest in time to the onset of the infectious event)</i></p> </td> <td data-bbox="933 981 1484 1361"> <p> _ _ _  /  _ _ _  /  _ _ _ _ _ </p> </td> </tr> <tr> <td data-bbox="571 1361 933 1485"> <p>5b. Blood culture result</p> </td> <td data-bbox="933 1361 1484 1485"> <p><input type="checkbox"/> culture positive</p> <p><input type="checkbox"/> culture negative (proceed to Q6)</p> </td> </tr> <tr> <td data-bbox="571 1485 933 1832"> <p>5c. Type of Organism cultured</p> </td> <td data-bbox="933 1485 1484 1832"> <p><input type="checkbox"/> Staph aureus</p> <p><input type="checkbox"/> Staph epidermidis</p> <p><input type="checkbox"/> Escherichia coli</p> <p><input type="checkbox"/> Klebsiella pneumonia</p> <p><input type="checkbox"/> MRSA (sensitive or resistant)</p> <p><input type="checkbox"/> other: specify.....</p> </td> </tr> </table> | <p>5a. Date blood cultures taken within 7 days of the onset of infectious event</p> <p><i>(if more than one culture was taken, then record either the positive result or the one closest in time to the onset of the infectious event)</i></p> | <p> _ _ _  /  _ _ _  /  _ _ _ _ _ </p> | <p>5b. Blood culture result</p> | <p><input type="checkbox"/> culture positive</p> <p><input type="checkbox"/> culture negative (proceed to Q6)</p> | <p>5c. Type of Organism cultured</p> | <p><input type="checkbox"/> Staph aureus</p> <p><input type="checkbox"/> Staph epidermidis</p> <p><input type="checkbox"/> Escherichia coli</p> <p><input type="checkbox"/> Klebsiella pneumonia</p> <p><input type="checkbox"/> MRSA (sensitive or resistant)</p> <p><input type="checkbox"/> other: specify.....</p> |
| <p>5a. Date blood cultures taken within 7 days of the onset of infectious event</p> <p><i>(if more than one culture was taken, then record either the positive result or the one closest in time to the onset of the infectious event)</i></p> | <p> _ _ _  /  _ _ _  /  _ _ _ _ _ </p>                                                                                                                                                                                                                                                                                 |                                                                                                                                                                                                                                                                                                                                                                                                                                                                                                                                                                                                                                                                                                                                                                                                                                                                                                                                                                                                                                                                                                                         |                                                                                                                                                                                                                                                |                                        |                                 |                                                                                                                   |                                      |                                                                                                                                                                                                                                                                                                                        |
| <p>5b. Blood culture result</p>                                                                                                                                                                                                                | <p><input type="checkbox"/> culture positive</p> <p><input type="checkbox"/> culture negative (proceed to Q6)</p>                                                                                                                                                                                                      |                                                                                                                                                                                                                                                                                                                                                                                                                                                                                                                                                                                                                                                                                                                                                                                                                                                                                                                                                                                                                                                                                                                         |                                                                                                                                                                                                                                                |                                        |                                 |                                                                                                                   |                                      |                                                                                                                                                                                                                                                                                                                        |
| <p>5c. Type of Organism cultured</p>                                                                                                                                                                                                           | <p><input type="checkbox"/> Staph aureus</p> <p><input type="checkbox"/> Staph epidermidis</p> <p><input type="checkbox"/> Escherichia coli</p> <p><input type="checkbox"/> Klebsiella pneumonia</p> <p><input type="checkbox"/> MRSA (sensitive or resistant)</p> <p><input type="checkbox"/> other: specify.....</p> |                                                                                                                                                                                                                                                                                                                                                                                                                                                                                                                                                                                                                                                                                                                                                                                                                                                                                                                                                                                                                                                                                                                         |                                                                                                                                                                                                                                                |                                        |                                 |                                                                                                                   |                                      |                                                                                                                                                                                                                                                                                                                        |
| <p>6.</p>                                                                                                                                                                                                                                      | <p>Was the catheter tip sent for culture analysis?</p>                                                                                                                                                                                                                                                                 | <p><input type="checkbox"/> Yes (proceed to Q7)</p> <p><input type="checkbox"/> No, tip was not sent (proceed to Q8)</p> <p><input type="checkbox"/> No, catheter was not removed (proceed to Q8)</p> <p><i>Additional question triggered in catheter removal page (Q2)</i></p>                                                                                                                                                                                                                                                                                                                                                                                                                                                                                                                                                                                                                                                                                                                                                                                                                                         |                                                                                                                                                                                                                                                |                                        |                                 |                                                                                                                   |                                      |                                                                                                                                                                                                                                                                                                                        |

# REDUCCTION CASE REPORT FORM

Site Number: |\_|\_|\_|\_|

Subject Number: |\_|\_|\_|\_|\_|\_|\_|\_|

|    |                                                                                                                                       |                                                   |                                                                                                                                                              |
|----|---------------------------------------------------------------------------------------------------------------------------------------|---------------------------------------------------|--------------------------------------------------------------------------------------------------------------------------------------------------------------|
| 7. |                                                                                                                                       | 7a. Date of catheter tip analysis                 | _ _ _  /  _ _ _  /  _ _ _ _ _                                                                                                                                |
|    |                                                                                                                                       | 7b. Analysis result                               | _  culture positive<br> _  culture negative (proceed to Q8)                                                                                                  |
|    |                                                                                                                                       | 7c. Type of Organism cultured                     | _  Staph aureus<br> _  Staph epidermidis<br> _  Escherichia coli<br> _  Klebsiella pneumonia<br> _  MRSA (sensitive or resistant)<br> _  other: specify..... |
| 8. | Were any swabs from the insertion site analysed?<br><i>(Report results for the swabs closest to the time of the infectious event)</i> | _  Yes (proceed to Q9)<br> _  No (proceed to Q10) |                                                                                                                                                              |
| 9. |                                                                                                                                       | 9a. Date of swab analysis                         | _ _ _  /  _ _ _  /  _ _ _ _ _                                                                                                                                |
|    |                                                                                                                                       | 9b. Analysis result                               | _  culture positive<br> _  culture negative (proceed to Question 10)                                                                                         |
|    |                                                                                                                                       | 9c. Type of Organism cultured                     | _  Staph aureus<br> _  Staph epidermidis<br> _  Escherichia coli<br> _  Klebsiella pneumonia<br> _  MRSA (sensitive or resistant)<br> _  other: specify..... |

REDUCCTION CASE REPORT FORM

Site Number: |\_|\_|\_|

Subject Number: |\_|\_|\_|\_|\_|

# REDUCCTION CASE REPORT FORM

Site Number: |\_|\_|\_|\_|

Subject Number: |\_|\_|\_|\_|\_|\_|\_|\_|

| Catheter removal* |                                                                                                                                                                                                |                                                                                                                                                                                                                                                                                                                                                                                                                                                                                                                                                                                                                                                                                    |
|-------------------|------------------------------------------------------------------------------------------------------------------------------------------------------------------------------------------------|------------------------------------------------------------------------------------------------------------------------------------------------------------------------------------------------------------------------------------------------------------------------------------------------------------------------------------------------------------------------------------------------------------------------------------------------------------------------------------------------------------------------------------------------------------------------------------------------------------------------------------------------------------------------------------|
| 1.                | <p>Has the participant's catheter been removed?</p> <p><i>Choose yes if it has been removed or is no longer under the care of the renal unit e.g. transferred to a non-REDUCCTION site</i></p> | <p><input type="checkbox"/> Yes (proceed to Q4)</p> <p><input type="checkbox"/> No (proceed to Q2/3)</p>                                                                                                                                                                                                                                                                                                                                                                                                                                                                                                                                                                           |
| 2.                | <p>Why was the catheter not removed?</p> <p><i>To be answered only if Infection form specifies that infectious event has occurred.</i></p>                                                     | <p><input type="checkbox"/> No options for replacement of catheter</p> <p><input type="checkbox"/> Good response to antibiotic treatment</p> <p><input type="checkbox"/> Poor peripheral access</p> <p><input type="checkbox"/> Other: specify.....</p>                                                                                                                                                                                                                                                                                                                                                                                                                            |
| 3.                | <p>Is there an intent to create non-catheter dialysis access in this patient?</p>                                                                                                              | <p><input type="checkbox"/> Yes (Form complete. Further follow up to be triggered in 2 weeks)</p> <p><input type="checkbox"/> No (Form complete. Further follow up to be triggered in 4 weeks)</p>                                                                                                                                                                                                                                                                                                                                                                                                                                                                                 |
| 4.                | <p>Date catheter removed</p>                                                                                                                                                                   | <p> _ _  /  _ _  /  _ _ _ _ </p>                                                                                                                                                                                                                                                                                                                                                                                                                                                                                                                                                                                                                                                   |
| 5.                | <p>What was the primary reason for this catheter's removal</p>                                                                                                                                 | <p><input type="checkbox"/> No Longer Required</p> <p><input type="checkbox"/> Poor flow</p> <p><input type="checkbox"/> Extruded cuff</p> <p><input type="checkbox"/> Local infection</p> <p><input type="checkbox"/> Proven sepsis</p> <p><input type="checkbox"/> Suspected sepsis</p> <p><input type="checkbox"/> Changed catheter site/type to reduce complication risk</p> <p><input type="checkbox"/> Patient discharge from our service</p> <p><input type="checkbox"/> Patient death with catheter in-situ (Link to death page)</p> <p><input type="checkbox"/> Patient transferred to non-REDUCCTION renal unit</p> <p><input type="checkbox"/> Other: specify .....</p> |
| 6.                | <p>Was the catheter replaced?</p>                                                                                                                                                              | <p><input type="checkbox"/> Yes (if yes, link to new catheter insertion form)</p> <p><input type="checkbox"/> No</p>                                                                                                                                                                                                                                                                                                                                                                                                                                                                                                                                                               |

# REDUCCTION CASE REPORT FORM

Site Number: |\_|\_|\_|\_|

Subject Number: |\_|\_|\_|\_|\_|\_|\_|\_|

|    |                                                                  |                                                                                                                                                                                                                                                                                                                                                                                                      |
|----|------------------------------------------------------------------|------------------------------------------------------------------------------------------------------------------------------------------------------------------------------------------------------------------------------------------------------------------------------------------------------------------------------------------------------------------------------------------------------|
| 7. | What was the primary reason that this catheter was not replaced? | <input type="checkbox"/> Recovery of Renal Function<br><input type="checkbox"/> Functional Haemodialysis access (AVF or AVG)<br><input type="checkbox"/> Functional Peritoneal dialysis access<br><input type="checkbox"/> Withdrew from treatment<br><input type="checkbox"/> Transplant<br><input type="checkbox"/> Death (proceed to death page)<br><input type="checkbox"/> Other: specify ..... |
|----|------------------------------------------------------------------|------------------------------------------------------------------------------------------------------------------------------------------------------------------------------------------------------------------------------------------------------------------------------------------------------------------------------------------------------------------------------------------------------|

# REDUCCTION CASE REPORT FORM

Site Number: |\_|\_|\_|\_|

Subject Number: |\_|\_|\_|\_|\_|\_|\_|\_|

| Participant Outcome (death)                                                      |                                                             |                                                                                                                                                                                                                                                                                            |                                                                                  |                                                             |
|----------------------------------------------------------------------------------|-------------------------------------------------------------|--------------------------------------------------------------------------------------------------------------------------------------------------------------------------------------------------------------------------------------------------------------------------------------------|----------------------------------------------------------------------------------|-------------------------------------------------------------|
| 1.                                                                               | Date of death*                                              | _ _ _  /  _ _ _  /  _ _ _ _ _                                                                                                                                                                                                                                                              |                                                                                  |                                                             |
| 2.                                                                               | Cause of death                                              | <input type="checkbox"/> Cardiovascular (proceed to Q4/ form complete)<br><input type="checkbox"/> Infection (If elected proceed to Q3).<br><input type="checkbox"/> Cancer (proceed to Q4/ form complete)<br><input type="checkbox"/> Other: specify ..... (proceed to Q4/ form complete) |                                                                                  |                                                             |
| 3.                                                                               | (Only to be answered if Q3= Infection)                      | <table border="1"> <tr> <td>Did the caring physician deem infection from the catheter as the cause of death?</td> <td> <input type="checkbox"/> Yes<br/> <input type="checkbox"/> No                             </td> </tr> </table>                                                      | Did the caring physician deem infection from the catheter as the cause of death? | <input type="checkbox"/> Yes<br><input type="checkbox"/> No |
| Did the caring physician deem infection from the catheter as the cause of death? | <input type="checkbox"/> Yes<br><input type="checkbox"/> No |                                                                                                                                                                                                                                                                                            |                                                                                  |                                                             |
| 4.                                                                               | Date of data entry                                          | _ _ _  /  _ _ _  /  _ _ _ _ _                                                                                                                                                                                                                                                              |                                                                                  |                                                             |
| 5.                                                                               | Data completed by                                           | .....                                                                                                                                                                                                                                                                                      |                                                                                  |                                                             |

| Adverse Events |                                                                                                                       |                                                                                                                                                                                             |
|----------------|-----------------------------------------------------------------------------------------------------------------------|---------------------------------------------------------------------------------------------------------------------------------------------------------------------------------------------|
| 1.             | Has the participant experienced any adverse events (which are viewed as probably related to the study intervention)?* | <input type="checkbox"/> Yes<br><input type="checkbox"/> No (form complete)                                                                                                                 |
| 2.             | Date of adverse event onset                                                                                           | _ _ _  /  _ _ _  /  _ _ _ _ _                                                                                                                                                               |
| 3.             | Event type                                                                                                            | <input type="checkbox"/> Allergy/Skin reaction<br><input type="checkbox"/> Catheter damage<br><input type="checkbox"/> Resistant organisms<br><input type="checkbox"/> Other: specify ..... |
| 4.             | Describe event                                                                                                        | .....                                                                                                                                                                                       |
| 5.             | Event outcome                                                                                                         | <input type="checkbox"/> Ongoing (skip to Q7. Re-triggered until Q5 outcome resolved).<br><input type="checkbox"/> Resolved<br><input type="checkbox"/> Resolved with sequelae              |
| 6.             | Date of event resolution                                                                                              | _ _ _  /  _ _ _  /  _ _ _ _ _                                                                                                                                                               |
| 7.             | Date of data entry                                                                                                    | _ _ _  /  _ _ _  /  _ _ _ _ _                                                                                                                                                               |

# REDUCCTION CASE REPORT FORM

Site Number: |\_|\_|\_|\_|

Subject Number: |\_|\_|\_|\_|\_|\_|\_|\_|

| Catheter removal* |                                                                                                                                                                                                                                                                  |                                                                                                                                                                                                                                                                                                                                    |
|-------------------|------------------------------------------------------------------------------------------------------------------------------------------------------------------------------------------------------------------------------------------------------------------|------------------------------------------------------------------------------------------------------------------------------------------------------------------------------------------------------------------------------------------------------------------------------------------------------------------------------------|
| 1.                | Has the patient's catheter been removed?                                                                                                                                                                                                                         | <input type="checkbox"/> Yes (proceed to Q3)<br><input type="checkbox"/> No, patient discharged from our service: (proceed to Q2)<br><input type="checkbox"/> Will complete later                                                                                                                                                  |
| 2.                | Is the patient being discharged to another participating REDUCCTION Renal unit?<br><br>More information: If you are unsure whether the unit is part of the REDUCCTION study, please refer to the REDUCCTION Site Directory or contact the study team for advice. | Date of transfer:  _ _  /  _ _  /  _ _ _ _ <br><br><input type="checkbox"/> Yes<br><input type="checkbox"/> No<br><br>Site name: .....(both options must complete free text entry)                                                                                                                                                 |
| 3.                | Date catheter removed                                                                                                                                                                                                                                            | _ _  /  _ _  /  _ _ _ _ <br><input type="checkbox"/> Will complete later                                                                                                                                                                                                                                                           |
| 4.                | Please specify the last dressing type used on this catheter prior to removal                                                                                                                                                                                     | <input type="checkbox"/> Semi-permeable, transparent dressing<br><input type="checkbox"/> Chlorhexidine impregnated patch<br><input type="checkbox"/> Chlorhexidine impregnated sponge<br><input type="checkbox"/> Alternative dressing (semi-permeable dressing not suitable for patient)<br><input type="checkbox"/> No dressing |
| 5.                | Was an antimicrobial locking solution used when this catheter was last accessed prior to its removal?                                                                                                                                                            | <input type="checkbox"/> Yes, anti-microbial citrate based lock<br><input type="checkbox"/> Yes, anti-microbial taurolidine based lock<br><input type="checkbox"/> Yes, anti-bacterial locking solutions (e.g. Gentamicin)<br><input type="checkbox"/> No<br><input type="checkbox"/> Will complete later                          |



# REDUCCTION CASE REPORT FORM

Site Number: I \_ I \_ I \_ I

Subject Number: I \_ I \_ I \_ I \_ I \_ I

|    |                                                                         |                                                                                                                                                                                                                                                                                                                                                                                                                                   |
|----|-------------------------------------------------------------------------|-----------------------------------------------------------------------------------------------------------------------------------------------------------------------------------------------------------------------------------------------------------------------------------------------------------------------------------------------------------------------------------------------------------------------------------|
| 6. | What was the primary reason for the removal of this catheter?           | <p>I_1_I No Longer Required</p> <p>I_2_I Poor flow</p> <p>I_3_I Extruded cuff</p> <p>I_4_I Local infection</p> <p>I_5_I Confirmed sepsis</p> <p>I_6_I Possible sepsis</p> <p>I_7_I Changed catheter site/type to reduce complication risk</p> <p>I_8_I Patient discharge from our service</p> <p>I_9_I Patient death with catheter in-situ (Link to death page Q1 + skip Removals Q6 and 7)</p> <p>I_11_I Other: specify.....</p> |
| 7. | Was the catheter replaced?                                              | <p>I_1_I Yes (go to question 7)</p> <p>I_2_I No (go to question 8)</p>                                                                                                                                                                                                                                                                                                                                                            |
| 8. | Was this catheter re-wired?                                             | <p>I_1_I Yes (link to new catheter insertion page)</p> <p>I_2_I No (link to new catheter insertion page)</p>                                                                                                                                                                                                                                                                                                                      |
| 9. | What was the primary reason that this catheter was <i>not</i> replaced? | <p>I_1_I Recovery of renal function</p> <p>I_2_I Functional Haemodialysis access (AVF or AVG)</p> <p>I_3_I Functional Peritoneal dialysis access</p> <p>I_4_I Withdrew from treatment</p> <p>I_5_I Transplant</p> <p>I_6_I Death (proceed to death page)</p> <p>I_7_I Other: specify .....</p> <p>I_8_I Will complete later</p>                                                                                                   |

# REDUCCTION CASE REPORT FORM

Site Number: |\_|\_|\_|\_|

Subject Number: |\_|\_|\_|\_|\_|\_|\_|\_|

## Post-Intervention Additional Questions

| Catheter Insertion |                                                                                                 |                                                                                                                                                                                                                                                                                                                                                                                    |
|--------------------|-------------------------------------------------------------------------------------------------|------------------------------------------------------------------------------------------------------------------------------------------------------------------------------------------------------------------------------------------------------------------------------------------------------------------------------------------------------------------------------------|
| 1.                 | Type of antiseptic solution used during insertion                                               | <input type="checkbox"/> ≥2% chlorhexidine with 70% alcohol<br><input type="checkbox"/> povidone-iodine<br><input type="checkbox"/> 70% alcohol<br><input type="checkbox"/> Other: specify .....<br><input type="checkbox"/> Not known<br><input type="checkbox"/> Will complete later                                                                                             |
| 2.                 | Was an ultrasound device used TO GUIDE catheter insertion?                                      | <input type="checkbox"/> Yes<br><input type="checkbox"/> No<br><input type="checkbox"/> Not known<br><input type="checkbox"/> Will complete later                                                                                                                                                                                                                                  |
| 3.                 | Type of dressing used at insertion                                                              | <input type="checkbox"/> Semi-permeable, transparent dressing<br><input type="checkbox"/> Chlorhexidine impregnated patch<br><input type="checkbox"/> Chlorhexidine impregnated sponge<br><input type="checkbox"/> Alternative dressing (semi-permeable dressing not suitable for patient)<br><input type="checkbox"/> No dressing<br><input type="checkbox"/> Will complete later |
| 4.                 | Will an antimicrobial locking solution be used on this catheter?                                | <input type="checkbox"/> Yes, anti-microbial citrate based lock<br><input type="checkbox"/> Yes, anti-microbial taurolidine based lock<br><input type="checkbox"/> Yes, anti-bacterial locking solutions (e.g. Gentamicin)<br><input type="checkbox"/> No<br><input type="checkbox"/> Will complete later                                                                          |
| 18.                | Was the patient given the REDUCCTION catheter care sheet within 24 hours of catheter insertion? | <input type="checkbox"/> Yes<br><input type="checkbox"/> No   <input type="checkbox"/> NA (NZ sites only)<br>If no, Please provide reason:.....                                                                                                                                                                                                                                    |

# REDUCCTION CASE REPORT FORM

Site Number: |\_|\_|\_|\_|

Subject Number: |\_|\_|\_|\_|\_|\_|\_|\_|

| Catheter Maintenance (To pop up when a catheter has been active for more than 28 days) |                                                                             |                                                                                                                                                                                                                                                                                                                                                                                                                                                    |
|----------------------------------------------------------------------------------------|-----------------------------------------------------------------------------|----------------------------------------------------------------------------------------------------------------------------------------------------------------------------------------------------------------------------------------------------------------------------------------------------------------------------------------------------------------------------------------------------------------------------------------------------|
| 1.                                                                                     | Type of catheter dressing currently utilised on this catheter               | <input type="checkbox"/> Semi-permeable, transparent dressing<br><input type="checkbox"/> Chlorhexidine impregnated patch<br><input type="checkbox"/> Chlorhexidine impregnated sponge<br><input type="checkbox"/> Alternative dressing (semi-permeable dressing not suitable for patient)<br><input type="checkbox"/> No dressing                                                                                                                 |
| 2.                                                                                     | Is an antimicrobial locking solution currently being used on this catheter? | <input type="checkbox"/> Yes, anti-microbial citrate based lock<br><input type="checkbox"/> Yes, anti-microbial taurolidine based lock<br><input type="checkbox"/> Yes, anti-bacterial locking solutions (e.g. Gentamicin)<br><input type="checkbox"/> No<br><input type="checkbox"/> Will complete later                                                                                                                                          |
| 3.                                                                                     | What plan is in place at 28 days for future dialysis access?                | <input type="checkbox"/> Expecting recovery of renal function (and no need for permanent access)<br><input type="checkbox"/> Expecting to use existing dialysis access after recovery/maturation<br><input type="checkbox"/> Surgery for permanent access creation is planned<br><input type="checkbox"/> Planned for permanent dialysis catheter use<br><input type="checkbox"/> No current plan<br><input type="checkbox"/> Other: specify:..... |

| Catheter removal* |                                                                              |                                                                                                                                                                                                                                                                                                                                    |
|-------------------|------------------------------------------------------------------------------|------------------------------------------------------------------------------------------------------------------------------------------------------------------------------------------------------------------------------------------------------------------------------------------------------------------------------------|
| 1.                | Please specify the last dressing type used on this catheter prior to removal | <input type="checkbox"/> Semi-permeable, transparent dressing<br><input type="checkbox"/> Chlorhexidine impregnated patch<br><input type="checkbox"/> Chlorhexidine impregnated sponge<br><input type="checkbox"/> Alternative dressing (semi-permeable dressing not suitable for patient)<br><input type="checkbox"/> No dressing |

# REDUCCTION CASE REPORT FORM

Site Number: |\_|\_|\_|\_|

Subject Number: |\_|\_|\_|\_|\_|\_|\_|\_|

|    |                                                                                                       |                                                                                                                                                                                                                                                                                                           |
|----|-------------------------------------------------------------------------------------------------------|-----------------------------------------------------------------------------------------------------------------------------------------------------------------------------------------------------------------------------------------------------------------------------------------------------------|
| 2. | Was an antimicrobial locking solution used when this catheter was last accessed prior to its removal? | <input type="checkbox"/> Yes, anti-microbial citrate based lock<br><input type="checkbox"/> Yes, anti-microbial taurolidine based lock<br><input type="checkbox"/> Yes, anti-bacterial locking solutions (e.g. Gentamicin)<br><input type="checkbox"/> No<br><input type="checkbox"/> Will complete later |
|----|-------------------------------------------------------------------------------------------------------|-----------------------------------------------------------------------------------------------------------------------------------------------------------------------------------------------------------------------------------------------------------------------------------------------------------|

| Adverse Events |                                                                                                                                   |                                                                                                                                                                                            |
|----------------|-----------------------------------------------------------------------------------------------------------------------------------|--------------------------------------------------------------------------------------------------------------------------------------------------------------------------------------------|
| 1.             | Date of adverse event onset                                                                                                       | _ _  /  _ _  /  _ _ _ _                                                                                                                                                                    |
| 2.             | Event type                                                                                                                        | <input type="checkbox"/> Allergy/Skin reaction<br><input type="checkbox"/> Catheter damage<br><input type="checkbox"/> Resistant organisms<br><input type="checkbox"/> Other: specify..... |
| 3.             | Describe event                                                                                                                    | .....                                                                                                                                                                                      |
| 4.             | Event outcome                                                                                                                     | <input type="checkbox"/> Ongoing (skip to Q7. Page not complete until options 2 or 3 elected)<br><input type="checkbox"/> Resolved<br><input type="checkbox"/> Resolved with sequelae      |
| 5..            | Date of event resolution                                                                                                          | _ _  /  _ _  /  _ _ _ _                                                                                                                                                                    |
| 6.             | Does the Investigator believe that this adverse event was reasonably related to a component of the REDUCCTION study Intervention? | <input type="checkbox"/> Yes<br><input type="checkbox"/> No<br><br>If yes, specify which component:<br>.....                                                                               |
